# Supplementary material
Source: Springer Nature journal article supplement (https://www.springermedizin.de/resource/supplementary/12962_2013_184_MOESM2_ESM.pdf/9571858)
Supplement: MOESM2 [file 9571858]

# Incremental cost per diarrhea episode averted (€)

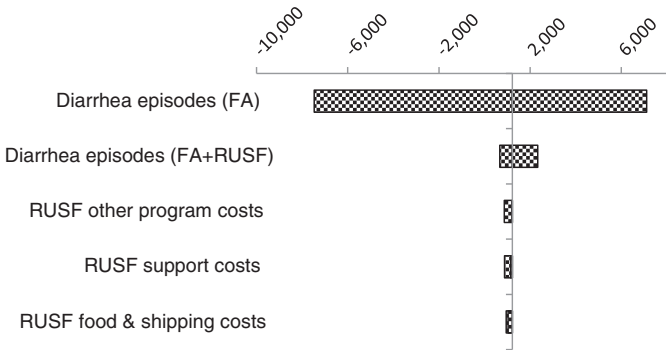

FA: Food Assistance; RUSF: Ready-to-use Supplementary Food
